# Supplementary material for: Consumer Assessment of Healthcare Providers and Systems Among Racial and Ethnic Minority Patients With Alzheimer Disease and Related Dementias
Source: JAMA Netw Open. 2022 Sep 27;5(9):e2233436. doi: 10.1001/jamanetworkopen.2022.33436 (PMC9516284; doi:10.1001/jamanetworkopen.2022.33436)
Supplement: Supplement. — eFigure. ACO CAHPS Top 25th Percentile by Race and Ethnicity eTable. Regression Results of ACO CAHPS Top 25th Percentile, Marginal Effects Were Reported [file jamanetwopen-e2233436-s001.pdf]

## Supplemental Online Content

Albaroudi A, Chen J. Consumer Assessment Of Healthcare Providers And Systems among racial and ethnic minority patients with Alzheimer disease and related dementias. *JAMA Netw Open*. 2022;5(9):e2233436.  
doi:10.1001/jamanetworkopen.2022.33436

**eFigure.** ACO CAHPS Top 25th Percentile by Race and Ethnicity

**eTable.** Regression Results of ACO CAHPS Top 25th Percentile, Marginal Effects Were Reported

This supplemental material has been provided by the authors to give readers additional information about their work.

**eFigure. ACO CAHPS Top 25th Percentile by Race and Ethnicity**

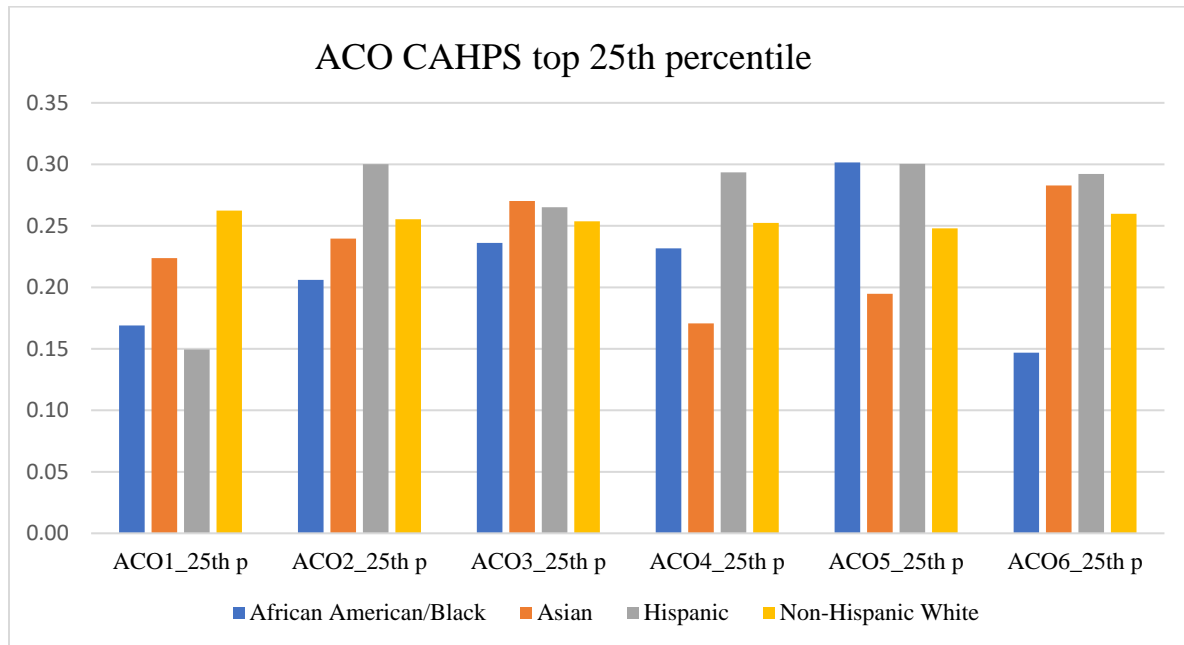

**eTable. Regression Results of ACO CAHPS Top 25th Percentile, Marginal Effects Were Reported**

|          | Any CAHPS individual score is in the top 25 <sup>th</sup> percentile    |        |        |        |
|----------|-------------------------------------------------------------------------|--------|--------|--------|
|          | ME                                                                      | 95% CI |        | p      |
| White    | reference                                                               |        |        |        |
| Black    | -0.024                                                                  | -0.029 | -0.019 | <0.001 |
| Asian    | 0.005                                                                   | -0.005 | 0.016  | 0.33   |
| Hispanic | 0.001                                                                   | -0.006 | 0.008  | 0.76   |
|          | Getting Timely Care, Appointments, and Information, top 25th percentile |        |        |        |
|          | ME                                                                      | 95% CI |        | p      |
| White    | reference                                                               |        |        |        |
| Black    | -0.030                                                                  | -0.035 | -0.025 | <0.001 |
| Asian    | 0.004                                                                   | -0.006 | 0.013  | 0.44   |
| Hispanic | -0.035                                                                  | -0.042 | -0.028 | <0.001 |
|          | How Well Your Providers Communicate, top 25th percentile                |        |        |        |
|          | ME                                                                      | 95% CI |        | p      |
| White    | reference                                                               |        |        |        |
| Black    | -0.027                                                                  | -0.032 | -0.022 | <0.001 |
| Asian    | -0.015                                                                  | -0.025 | -0.005 | 0.004  |
| Hispanic | -0.021                                                                  | -0.027 | -0.015 | <0.001 |
|          | Patients' Rating of Provider top 25th percentile                        |        |        |        |
|          | ME                                                                      | 95% CI |        | p      |
| White    | reference                                                               |        |        |        |

|          |                                                    |        |        |        |
|----------|----------------------------------------------------|--------|--------|--------|
| Black    | -0.024                                             | -0.029 | -0.019 | <0.001 |
| Asian    | 0.005                                              | -0.005 | 0.014  | 0.32   |
| Hispanic | 0.000                                              | -0.007 | 0.006  | 0.88   |
|          | Access to Specialists top 25th percentile          |        |        |        |
|          | ME                                                 | 95% CI |        | p      |
| White    | reference                                          |        |        |        |
| Black    | -0.026                                             | -0.031 | -0.021 | <0.001 |
| Asian    | -0.041                                             | -0.052 | -0.029 | <0.001 |
| Hispanic | 0.037                                              | 0.031  | 0.043  | <0.001 |
|          | Health Promotion and Education top 25th percentile |        |        |        |
|          | ME                                                 | 95% CI |        | p      |
| White    | reference                                          |        |        |        |
| Black    | 0.010                                              | 0.006  | 0.014  | <0.001 |
| Asian    | -0.007                                             | -0.017 | 0.004  | 0.20   |
| Hispanic | 0.075                                              | 0.069  | 0.080  | <0.001 |
|          | Shared Decision Making top 25th percentile         |        |        |        |
|          | ME                                                 | 95% CI |        | p      |
| White    | reference                                          |        |        |        |
| Black    | -0.020                                             | -0.025 | -0.015 | <0.001 |
| Asian    | 0.028                                              | 0.019  | 0.037  | <0.001 |
| Hispanic | 0.017                                              | 0.011  | 0.023  | <0.001 |
